# Supplementary material for: Ex Situ Study on the Co-Preparation of Pitch and Carbon Black from Petroleum Residue to Improve the Cost-Efficiency of the Pitch Synthesis Plant
Source: MDPI journal article supplement (doi:10.3390/ma16093592), 2023-05-08
Supplement: s1 [file s1]

## Supplementary Information

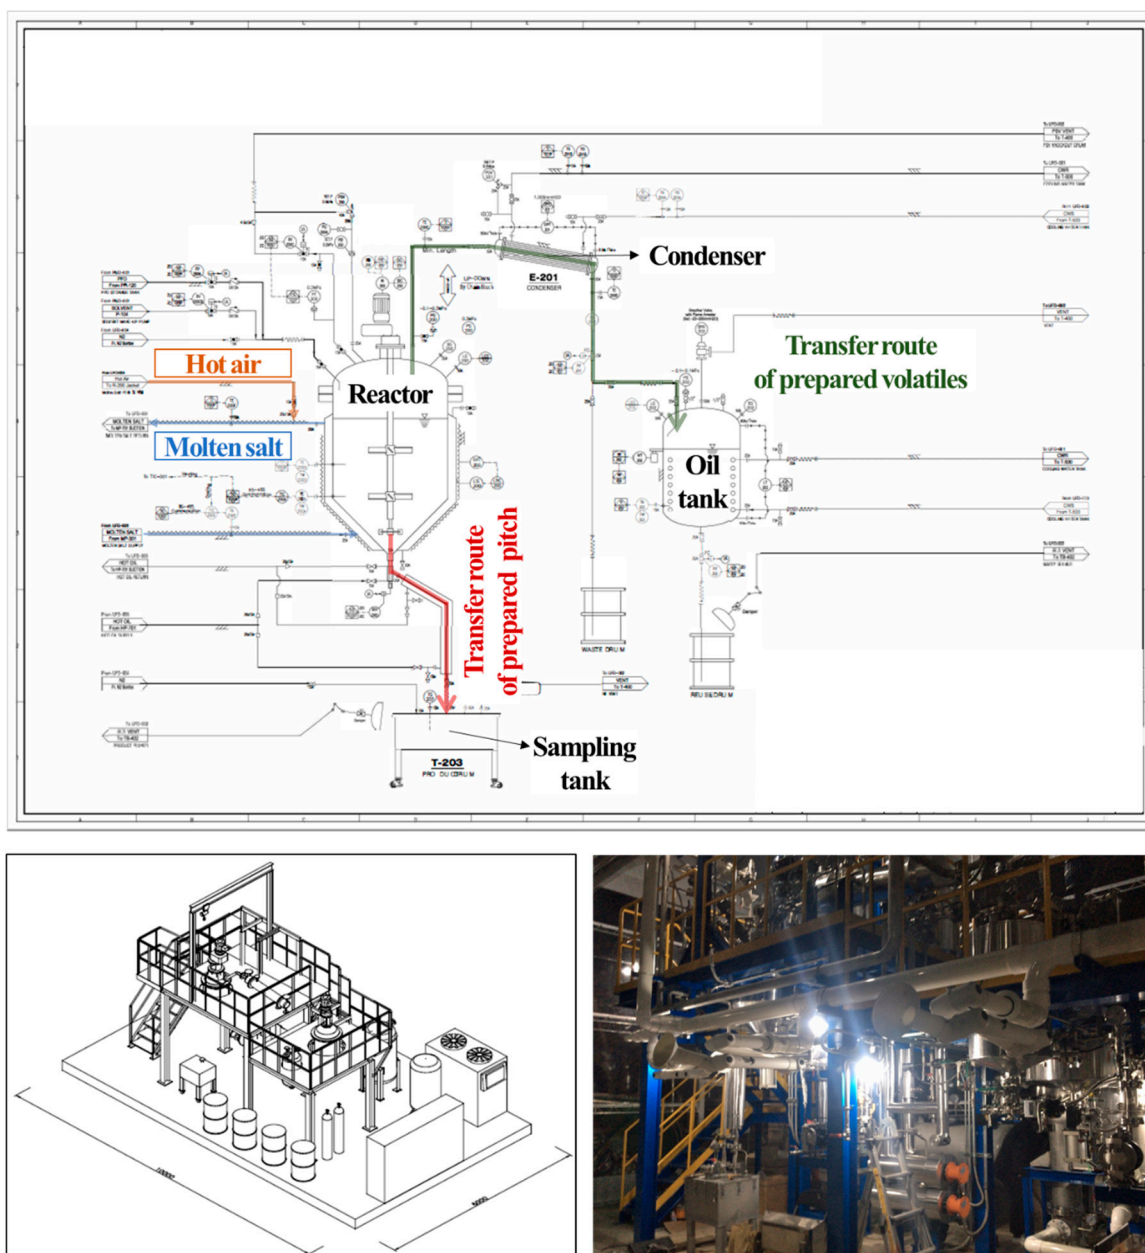

**Figure S1.** P&ID diagram and process schematics of 150L scale pilot plant for pitch synthesis.

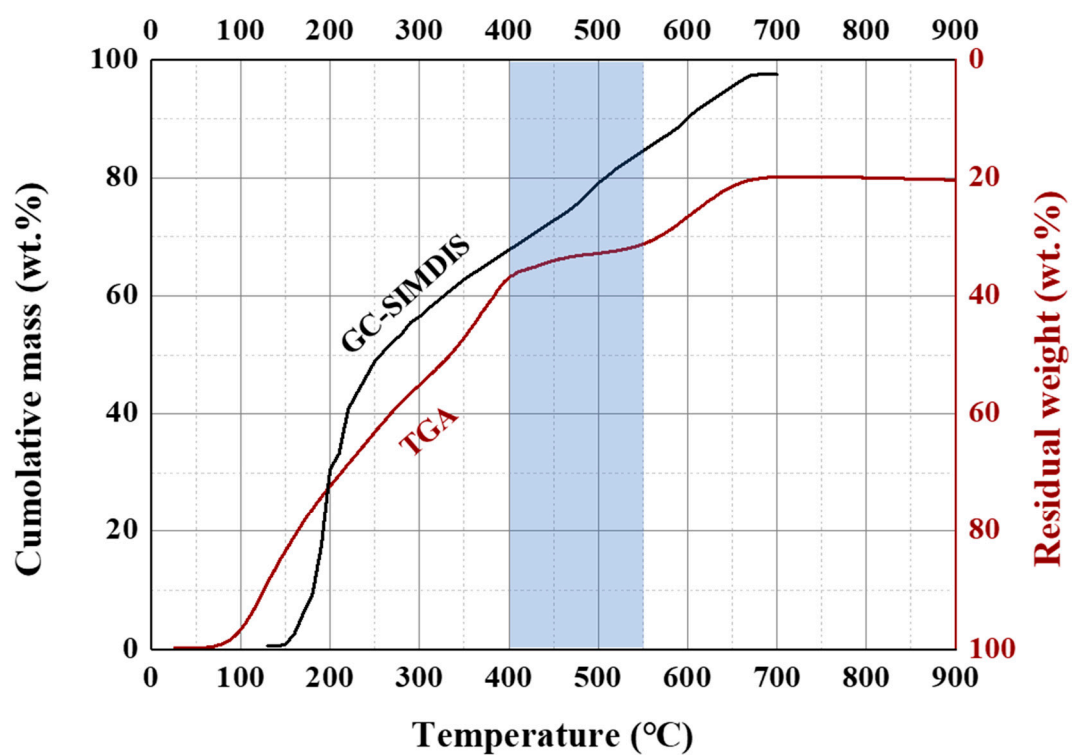

**Figure S2.** Comparing the cumulative mass of GC-SIMDIS and residual weight of TGA.

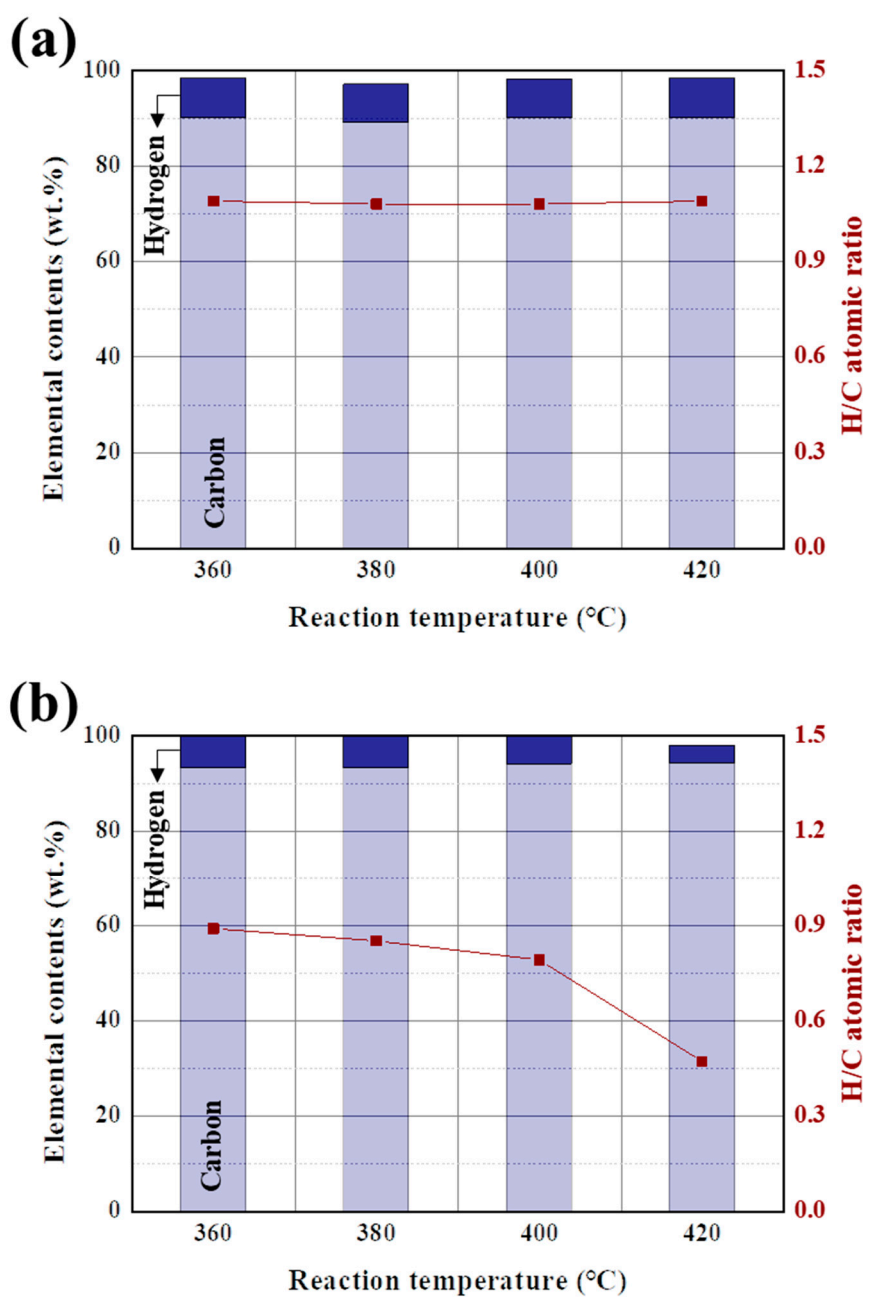

**Figure S3.** Elemental contents of (a) prepared pitch and (b) volatile, according to the reaction temperature.

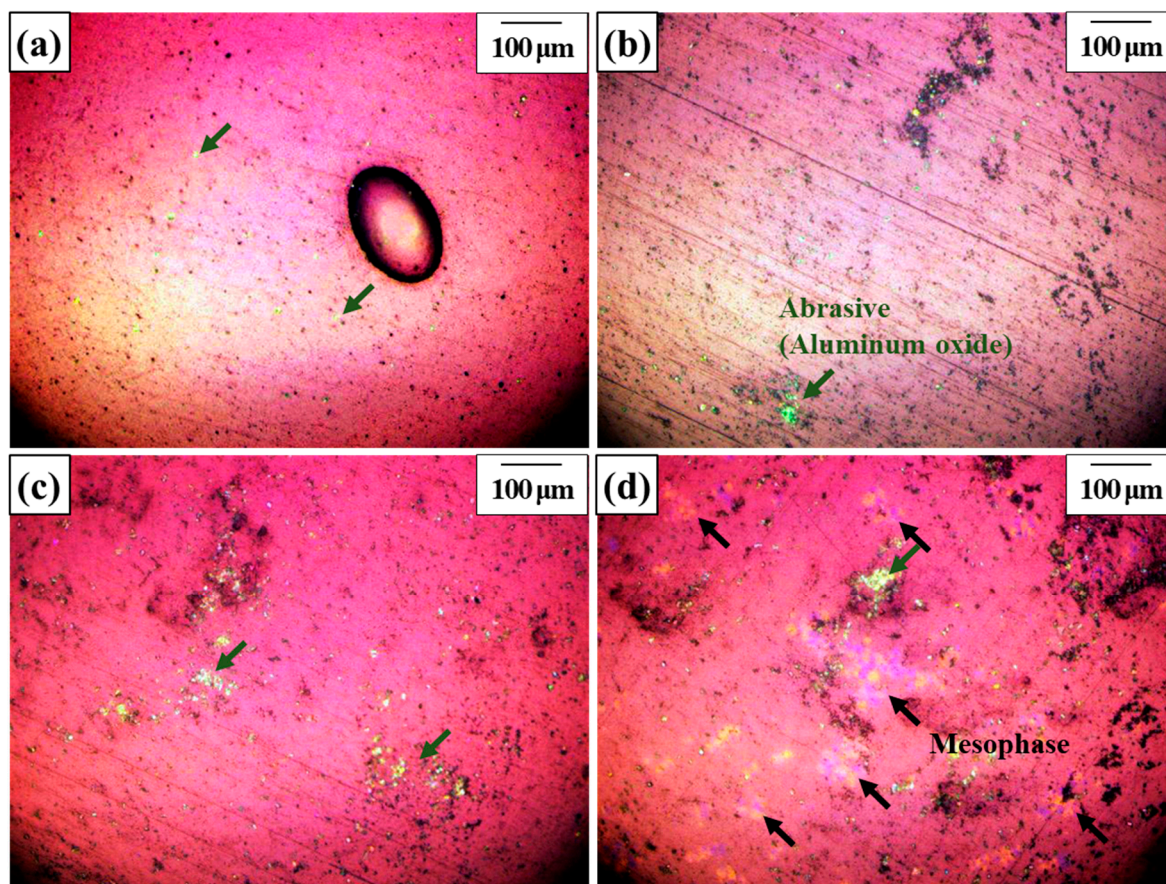

**Figure S4.** Image of polarized optical microscopy of the prepared pitch at (a) 360°C, (b) 380°C, (c) 400°C, and (d) 420°C.

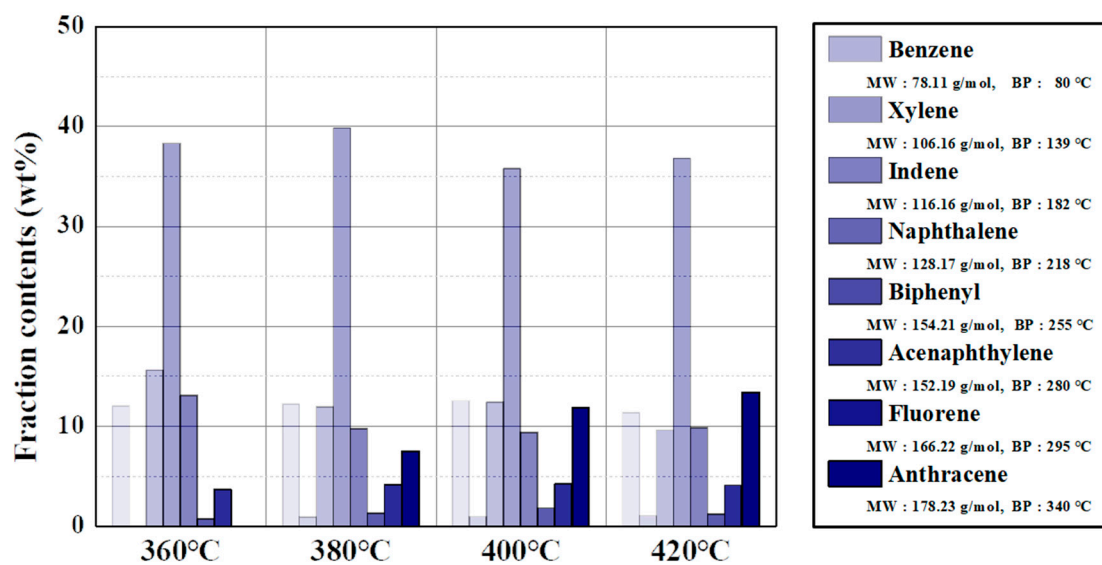

**Figure S5.** Fraction contents of volatiles calculated from GC-MS at 360-420 °C.



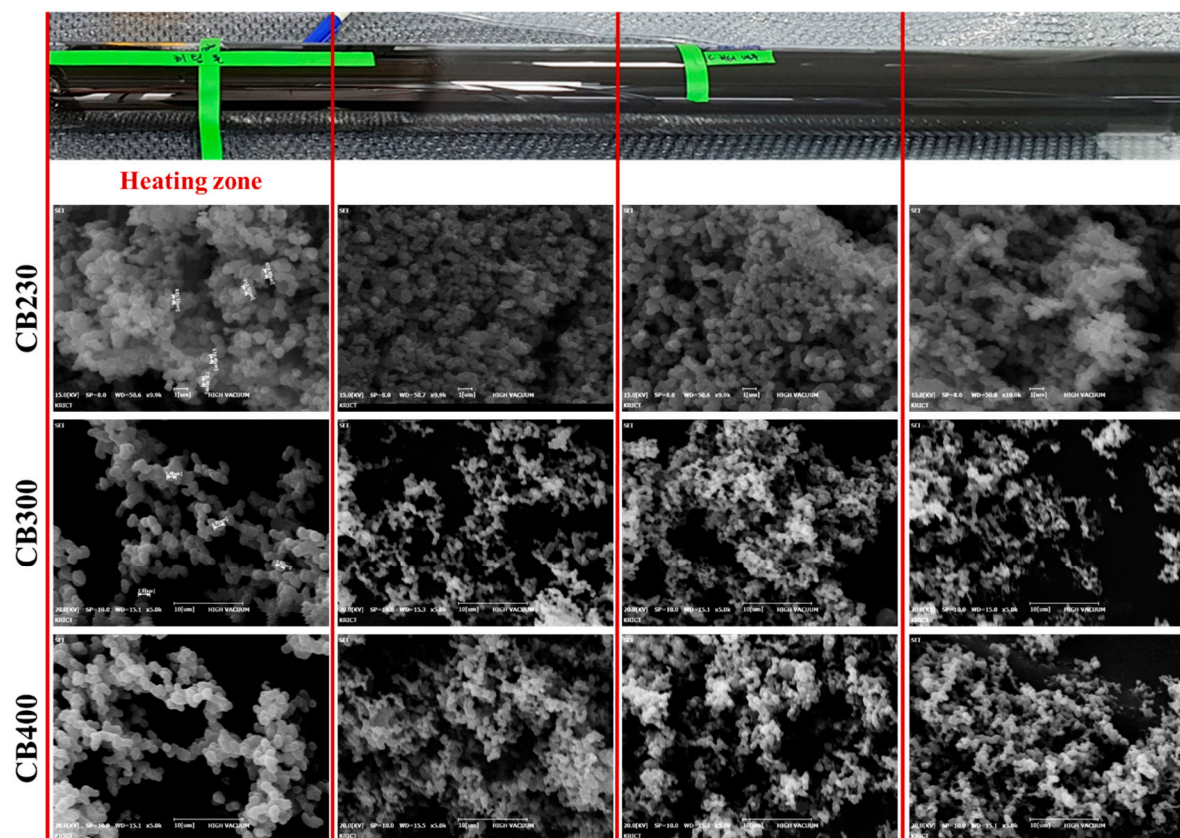

**Figure S6.** FE-SEM images of prepared carbon black according to the used precursors and position of the reaction tube.
